# Supplementary material for: A comprehensive study of phospholipid fatty acid rearrangements in metabolic syndrome: correlations with organ dysfunction
Source: PubMed Central journal article supplement (PMC7328154; doi:10.1242/dmm.043927), 2020-06-17
Supplement: dmm-13-043927-s1.pdf [file dmm-13-043927-s1.pdf]

Supplementary Data

Supplementary Fig. 1

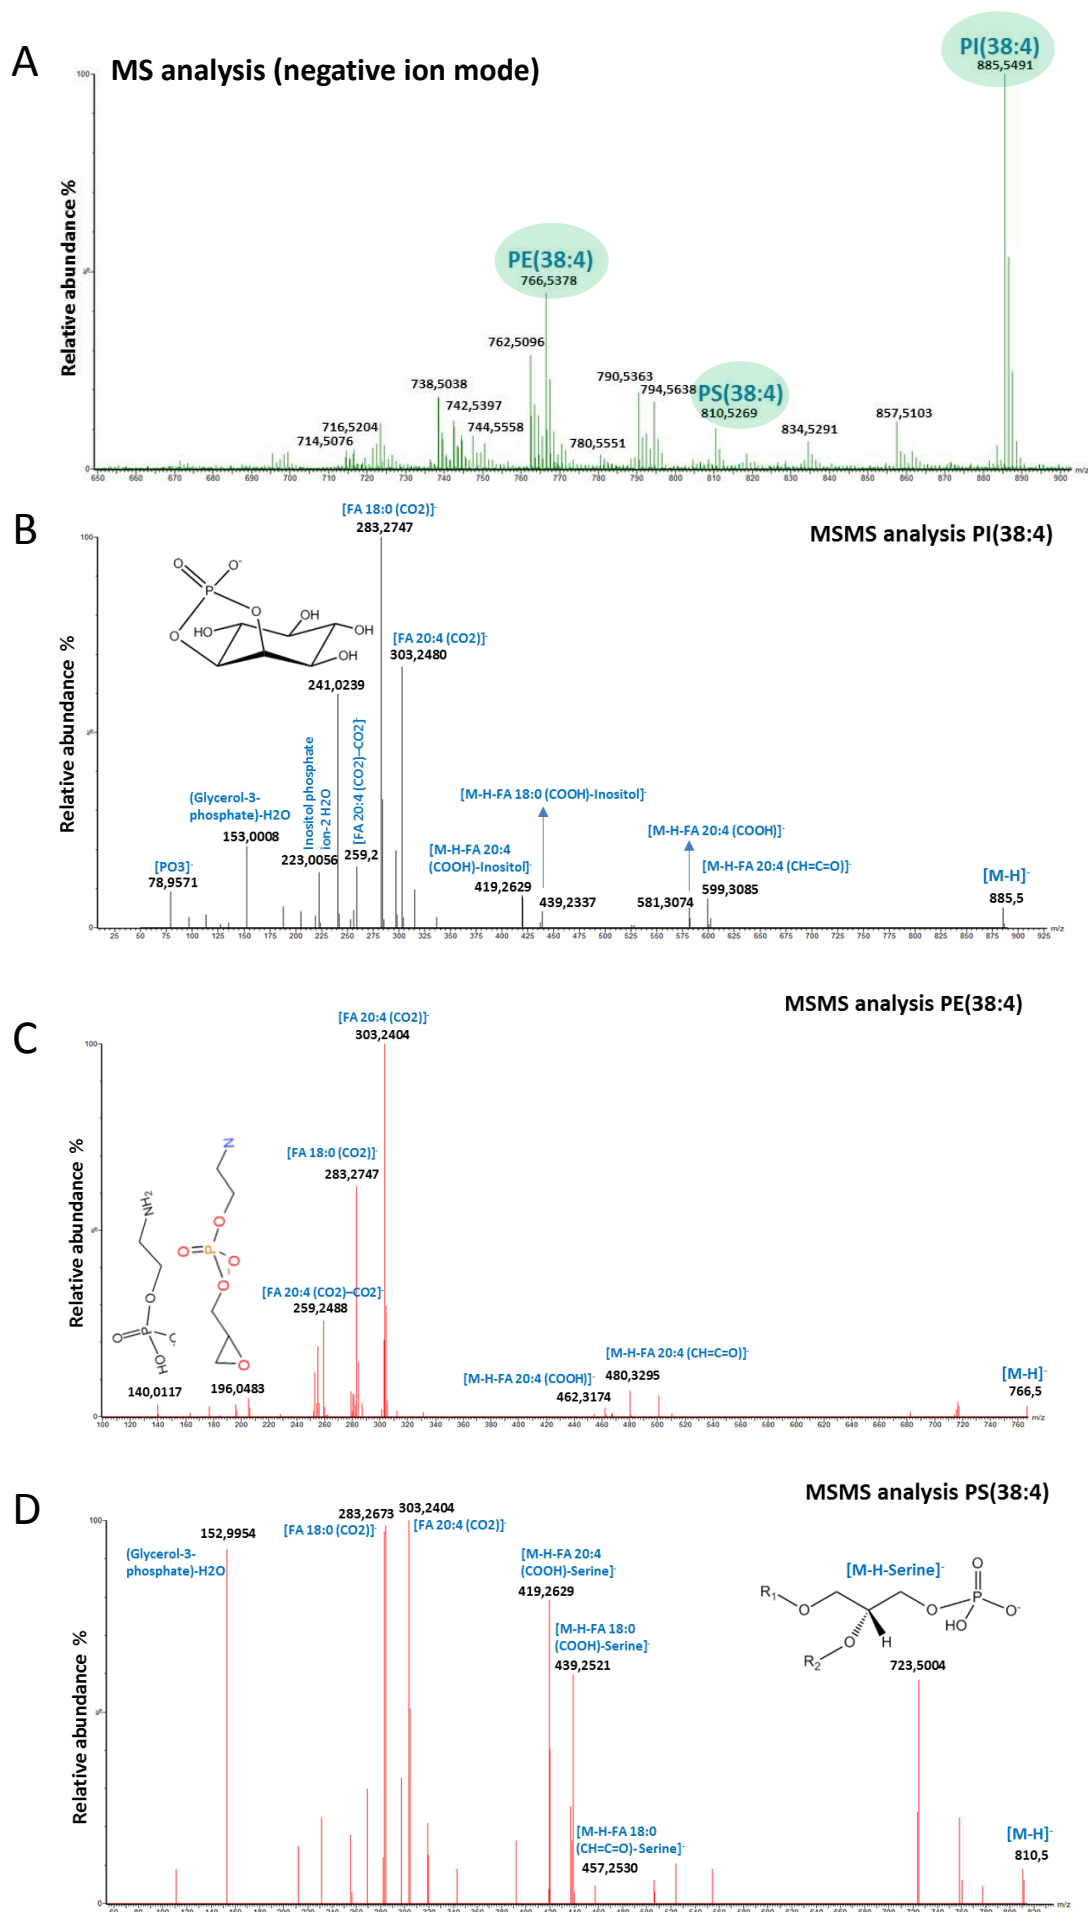

Figure S1: Analysis strategy of Phospholipids (PI, PE and PS) by mass spectrometry in the negative ion mode.

A) Mass spectrum of liver lipid extract in negative ion mode showing main phospholipid species as  $[M-H]^-$  ion. B) MS/MS spectrum of PI (38:4) in negative ion mode showing different fragment ions. Characteristic ions with  $m/z$  259.2, 241 and 223 corresponding to the inositol phosphate ion, inositol phosphate ion with the loss of one and two molecules of water respectively, allowed the identification of PI polar head group. Abundant ions with  $m/z$  283.2 (stearic acid detected as  $RCOO^-$ ) and  $m/z$  303.2 (arachidonic acid detected as  $RCOO^-$ ) allowed the identification of the fatty acyl chains. Other fragment ions with  $m/z$ : 78.9 ( $PO_3^-$  ion), 153 (glycerol-3-phosphate ion with loss of  $H_2O$ ), 419.2 (neutral loss of sn2  $RCOOH$  group and inositol from  $[M-H]^-$ ), 439.2 (neutral loss of sn1  $RCOOH$  group and inositol from  $[M-H]^-$ ), 581.3 (neutral loss of sn2  $RCOOH$  group from  $[M-H]^-$ ) and 599.3 (loss of sn2 acyl chain as  $RCH=C=O$ ) from  $[M-H]^-$ ) were also detected in negative ion mode. C) MS/MS spectrum of PE (38:4) in negative ion mode. Characteristic ions of  $m/z$  140 (ethanolamine phosphate ion) and  $m/z$  196 (dilyso-PE with the loss of  $H_2O$ ) allowed the identification of PE polar head group. Abundant ions of  $m/z$  283.2 (stearic acid detected as  $RCOO^-$ ) and  $m/z$  303.2 (arachidonic acid detected as  $RCOO^-$ ) allowed the identification of the fatty acyl chains. Other ions corresponding to the neutral loss of sn2 as  $RCOOH$  group from  $[M-H]^-$  and the loss of sn2 acyl chain as  $RCH=C=O$  from  $[M-H]^-$ , with  $m/z$  462.3 and 480.3 respectively, were also detected. D) MS/MS spectrum of PS (38:4) in negative ion mode. Characteristic fragment ion corresponding to the loss of serine from precursor ion with  $m/z$  723.5 was detected. Fragment ions corresponding to the loss of sn1 acyl chain as  $RCH=C=O$  and serine from  $[M-H]^-$ , neutral loss of sn1  $RCOOH$  group and serine from  $[M-H]^-$ , and neutral loss of sn2  $RCOOH$  group and serine from  $[M-H]^-$  with  $m/z$  457.2, 439.2 and 419.2 respectively, were observed to be characteristic fragments of this compound in negative ion mode. Fragment ions with  $m/z$  283.2 (stearic acid detected as  $RCOO^-$ ) and  $m/z$  303.2 (arachidonic acid detected as  $RCOO^-$ ) allowed the identification of the fatty acyl chains. Glycerol-3-phosphate ion with loss of  $H_2O$  ( $m/z$  152.9) was also detected in negative ion mode. Data processing of fragment ions spectra was carried out with Biovia Draw 19,1<sup>©</sup> and MassLynx 4,1<sup>©</sup> software with the help of Lipid Maps Lipidomics Gateway<sup>®</sup>.

## Supplementary Fig. 2

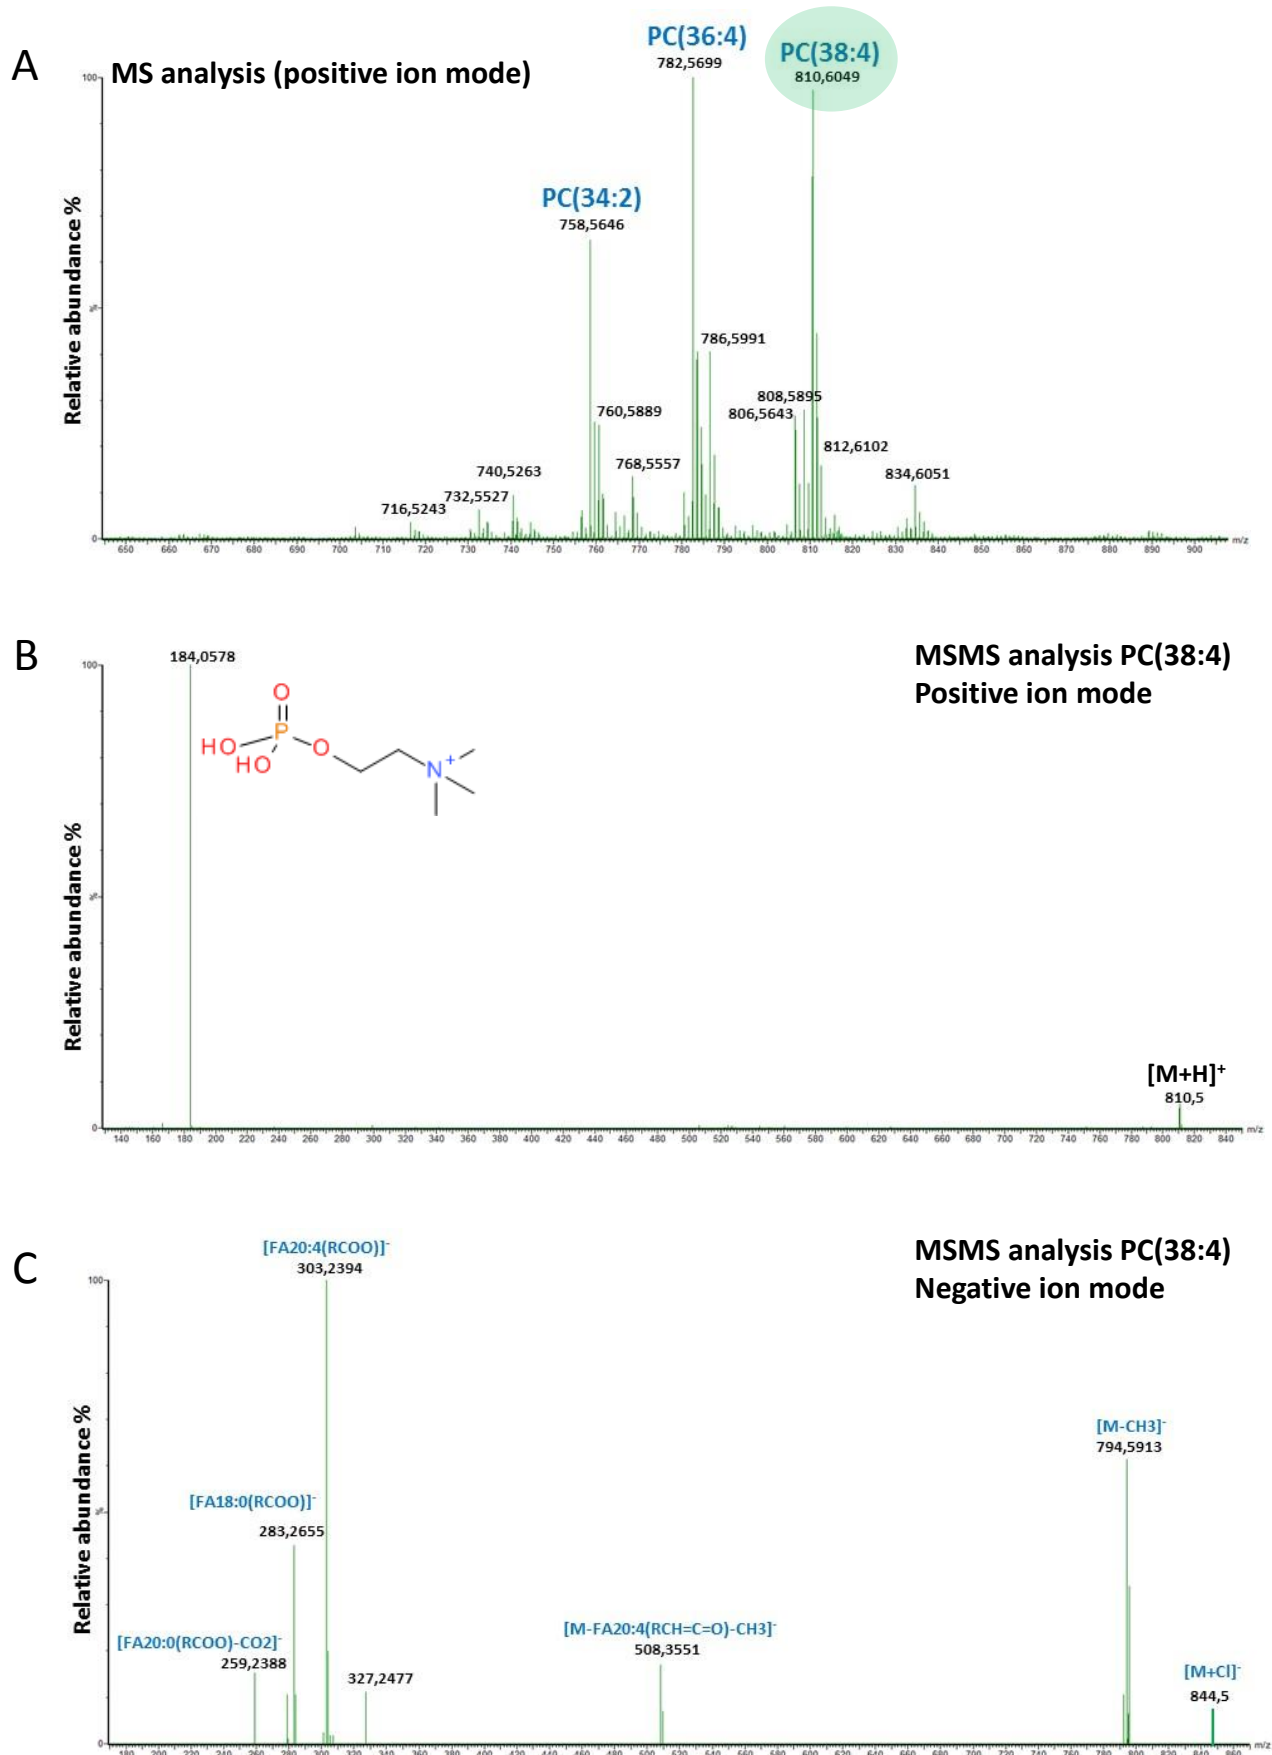

Figure S2: Analysis strategy of Phosphatidylcholine species by mass spectrometry. A) Mass spectrum of liver lipid extract in positive ion mode showing main PhosphatidylCholine (PC) species as protonated ions  $[M+H]^+$ . B) MS/MS spectrum of PC (38:4) in positive ion mode. This spectrum allowed the identification of the polar head of PC class (characteristic fragment ion with  $m/z$  184). C) MS/MS spectrum of PC (38:4) in negative ion mode as  $[M+Cl]^-$  adduct. Abundant ions with  $m/z$  283.2 (stearic acid detected as  $RCOO^-$ ) and  $m/z$  303.2 (arachidonic acid detected as  $RCOO^-$ ) allowed the identification of the fatty acyl chains. Other characteristic fragment ions corresponding to the loss of  $CH_3$  and chloride from precursor ion, and to the loss of sn2 acyl chain as  $RCH=C=O$ ,  $CH_3$  and chloride from precursor ion with  $m/z$  794.5 and 508.3 respectively, were detected in negative ion mode. Ion corresponding to the loss of  $CO_2$  from sn2  $RCOO^-$  was also observed with  $m/z$  259.2. Data processing of fragment ions spectra was carried out with Biovia Draw 19,1© and MassLynx 4,1© software with the help of Lipid Maps Lipidomics Gateway®.

### Supplementary Fig. 3

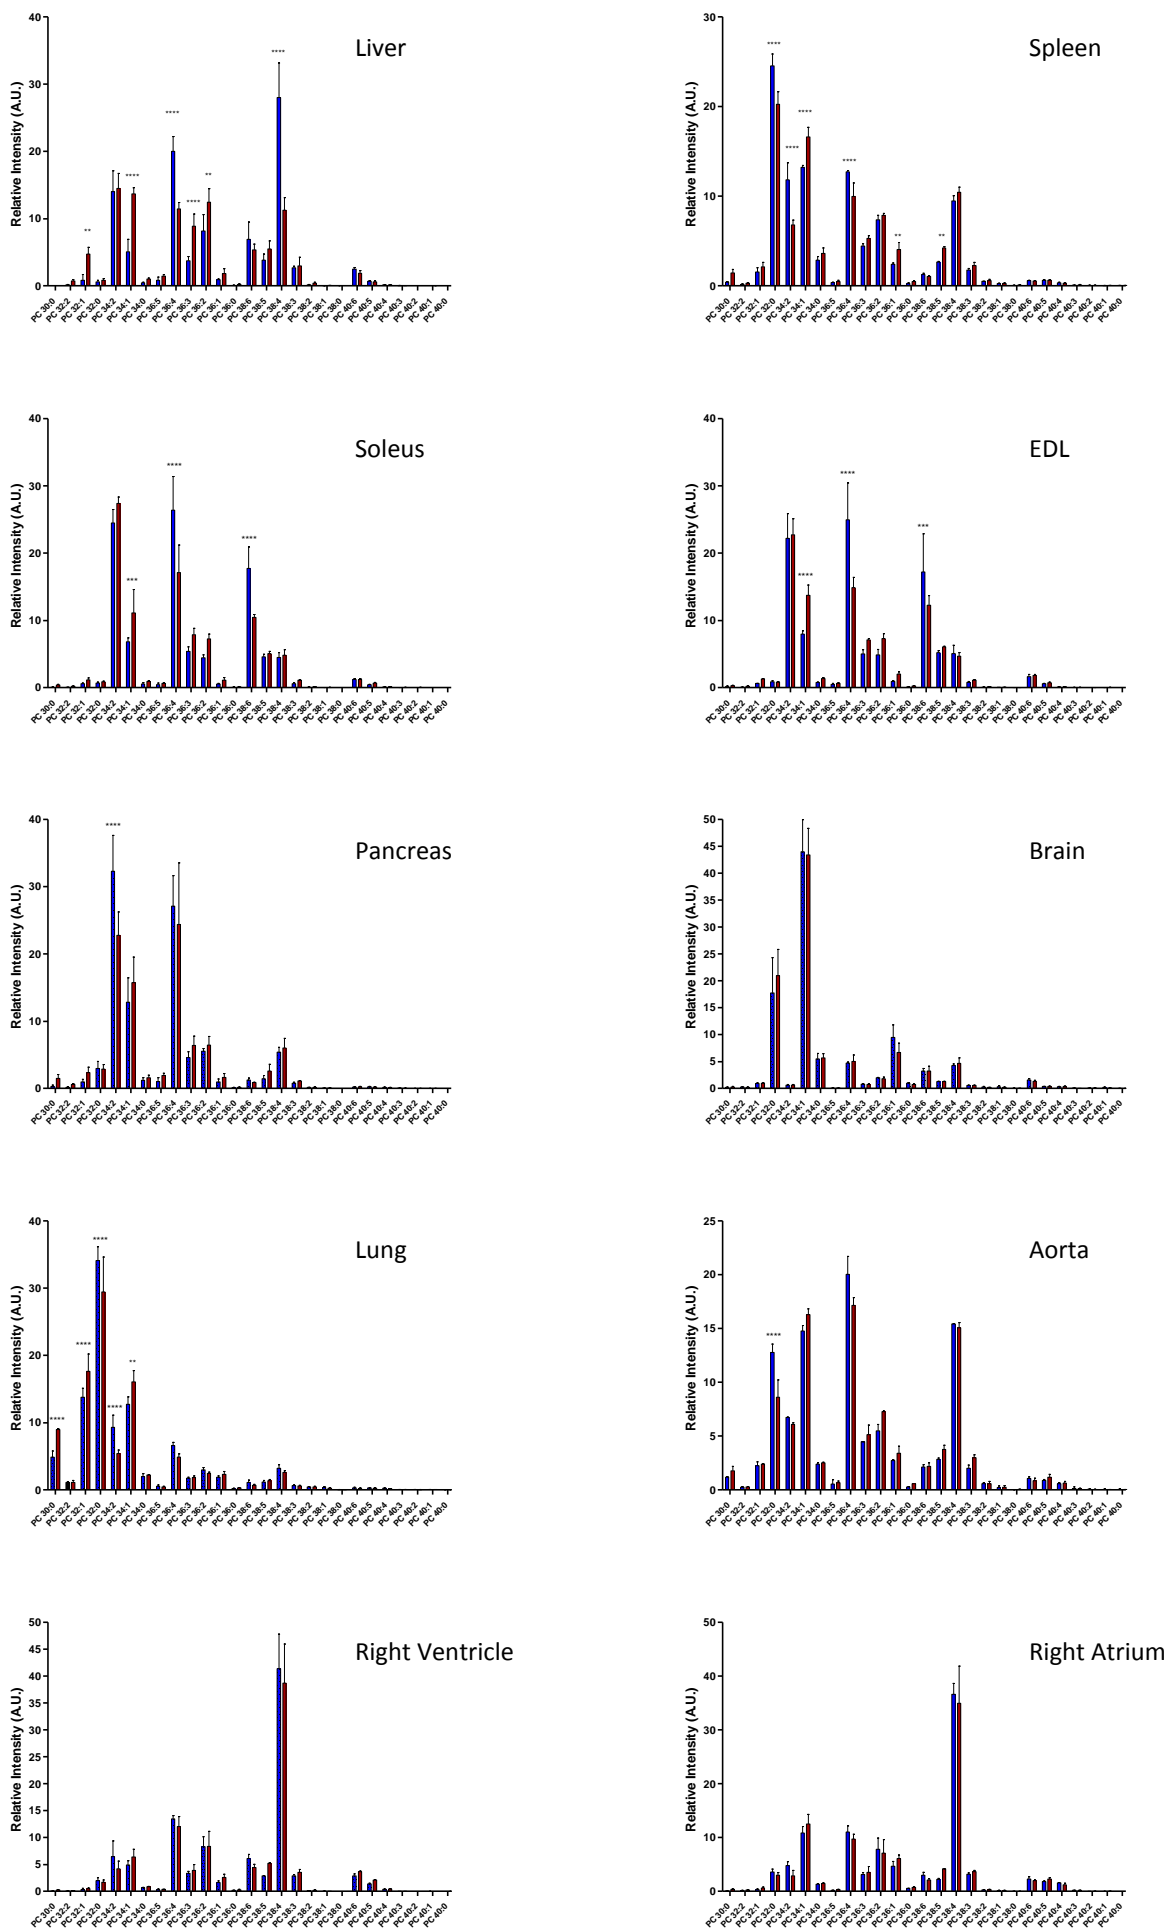

Figure S3: PC species distribution in various organs as a function of the diet.

Total lipids were extracted and phospholipid species were purified and analyzed by ESI-MS from samples corresponding to the indicated organs obtained either from rats fed with a normal (CTL) or HFHF diet (HFHF), as described in the “Materials and Methods” section. PC subspecies distribution in each case are displayed. The total carbon chain length (x) and number of carbon-carbon double bonds (y) of the main PC molecular species (x:y) are indicated. Values are means  $\pm$  S.D. of four independent determinations from four individuals from both groups in each case.

Statistical analysis was performed using two-way ANOVA, completed by Bonferroni post-tests to compare means variations between the two groups of animals for each PC subspecies.

Significant differences between CTL and HFHF are indicated (\*\*\*\*P < 0.0001, \*\*\*P < 0.001, and \*\*P < 0.01).

# Supplementary Fig. 4

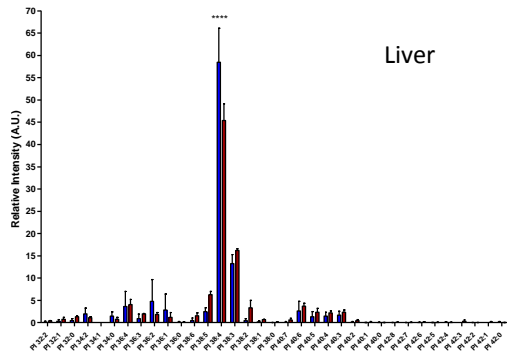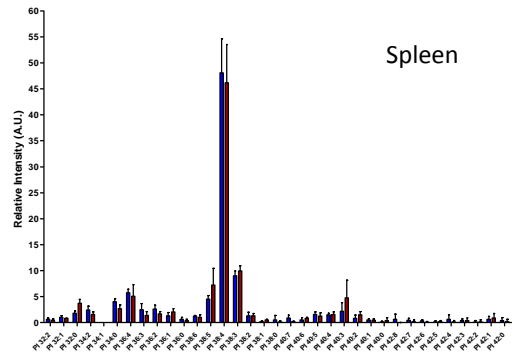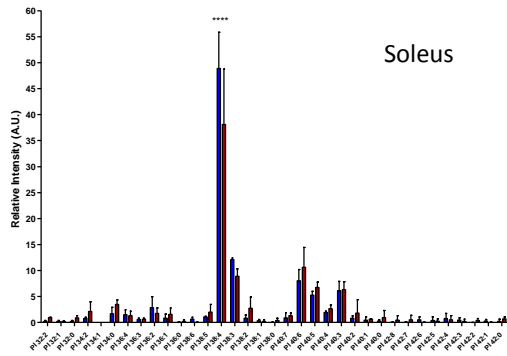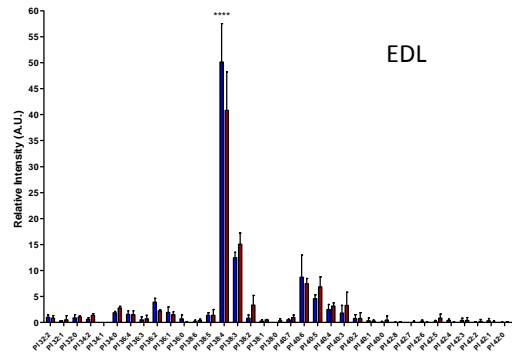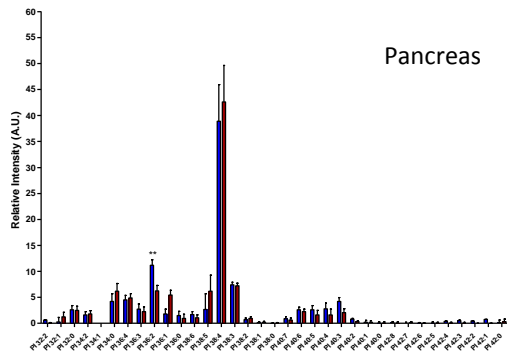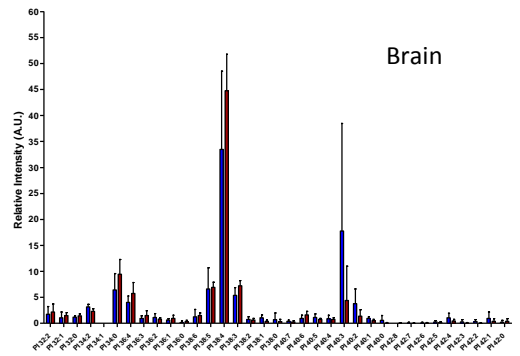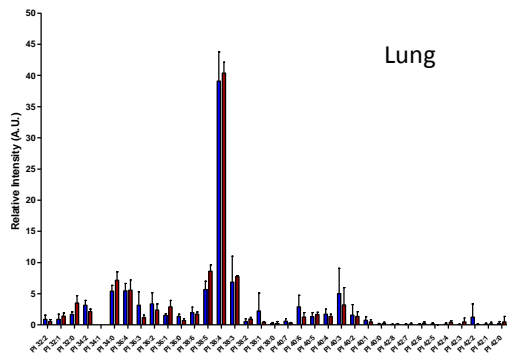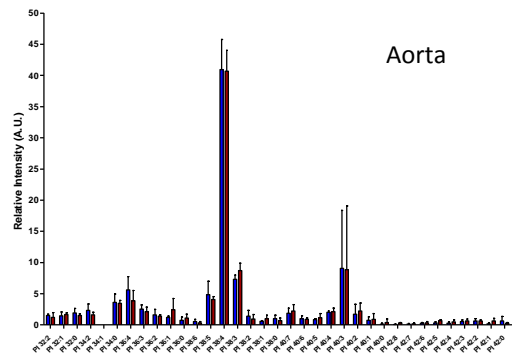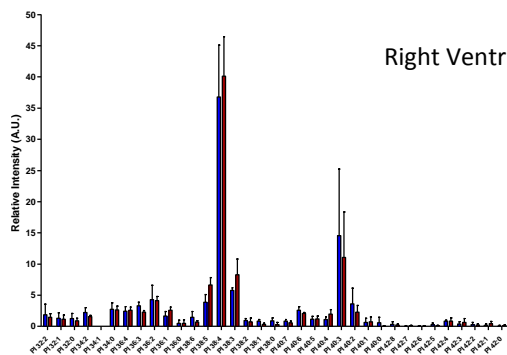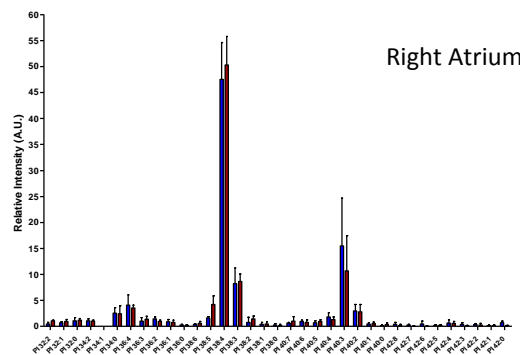

Figure S4: PI species distribution in various organs as a function of the diet.

Total lipids were extracted and phospholipid species were purified and analyzed by ESI-MS from samples corresponding to the indicated organs obtained either from rats fed with a normal (CTL) or HFHF diet (HFHF), as described in the “Materials and Methods” section. PI subspecies distribution in each case are displayed. The total carbon chain length (x) and number of carbon-carbon double bonds (y) of the main PI molecular species (x:y) are indicated. Values are means  $\pm$  S.D. of four independent determinations from four individuals from both groups in each case. Statistical analysis was performed using two-way ANOVA, completed by Bonferroni post-tests to compare means variations between the two groups of animals for each PI subspecies. Significant differences between CTL and HFHF are indicated (\*\*\*\*P < 0.0001, \*\*\*P < 0.001, and \*\*P < 0.01).



# Supplementary Fig. 5

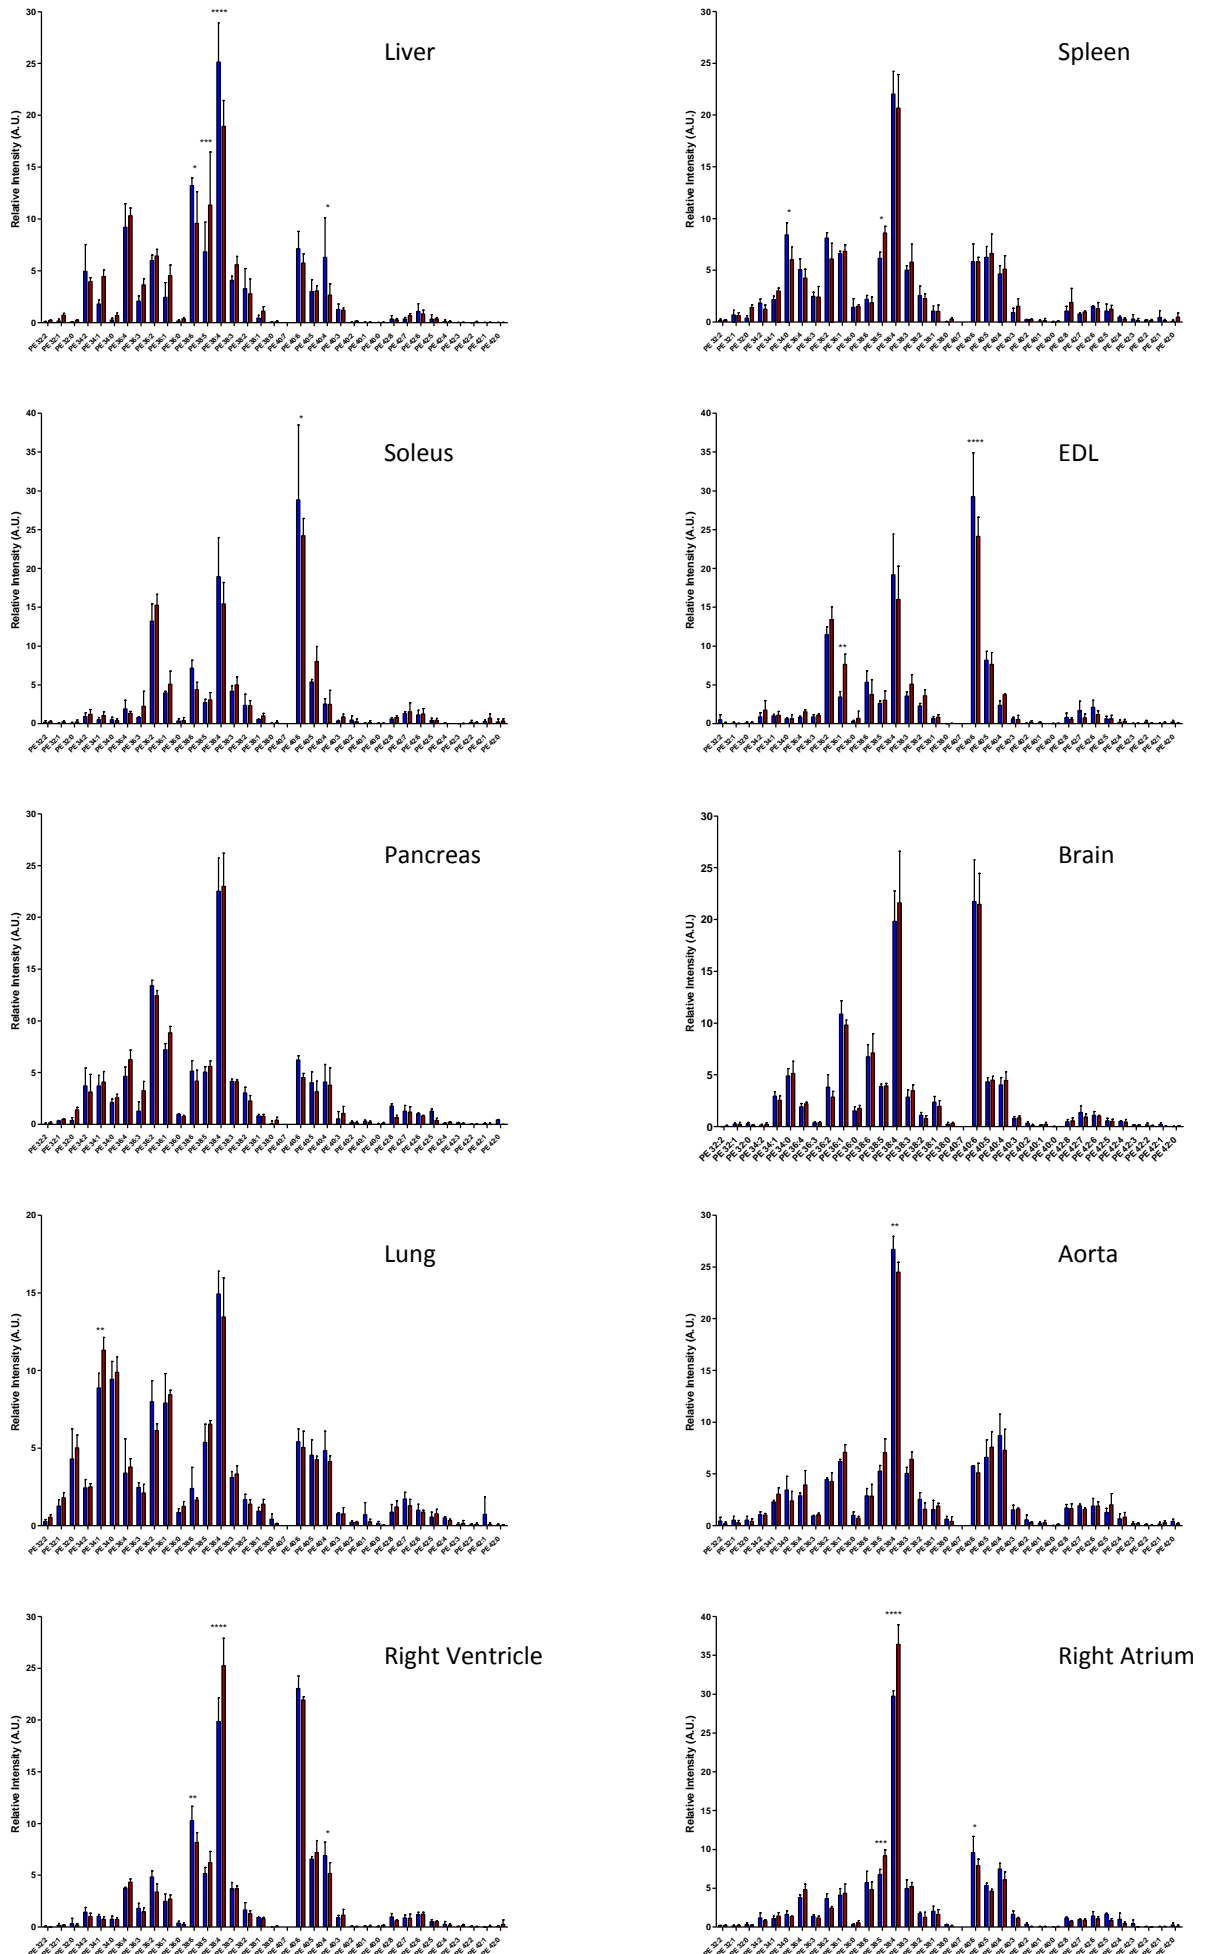

Figure S5: PE species distribution in various organs as a function of the diet.

Total lipids were extracted and phospholipid species were purified and analyzed by ESI-MS from samples corresponding to the indicated organs obtained either from rats fed with a normal (CTL) or HFHF diet (HFHF), as described in the “Materials and Methods” section. PE subspecies distribution in each case are displayed. The total carbon chain length (x) and number of carbon-carbon double bonds (y) of the main PE molecular species (x:y) are indicated. Values are means  $\pm$  S.D. of four independent determinations from four individuals from both groups in each case. Statistical analysis was performed using two-way ANOVA, completed by Bonferroni post-tests to compare means variations between the two groups of animals for each PE subspecies. Significant differences between CTL and HFHF are indicated (\*\*\*\*P < 0.0001, \*\*\*P < 0.001, and \*\*P < 0.01).

# Supplementary Fig. 6

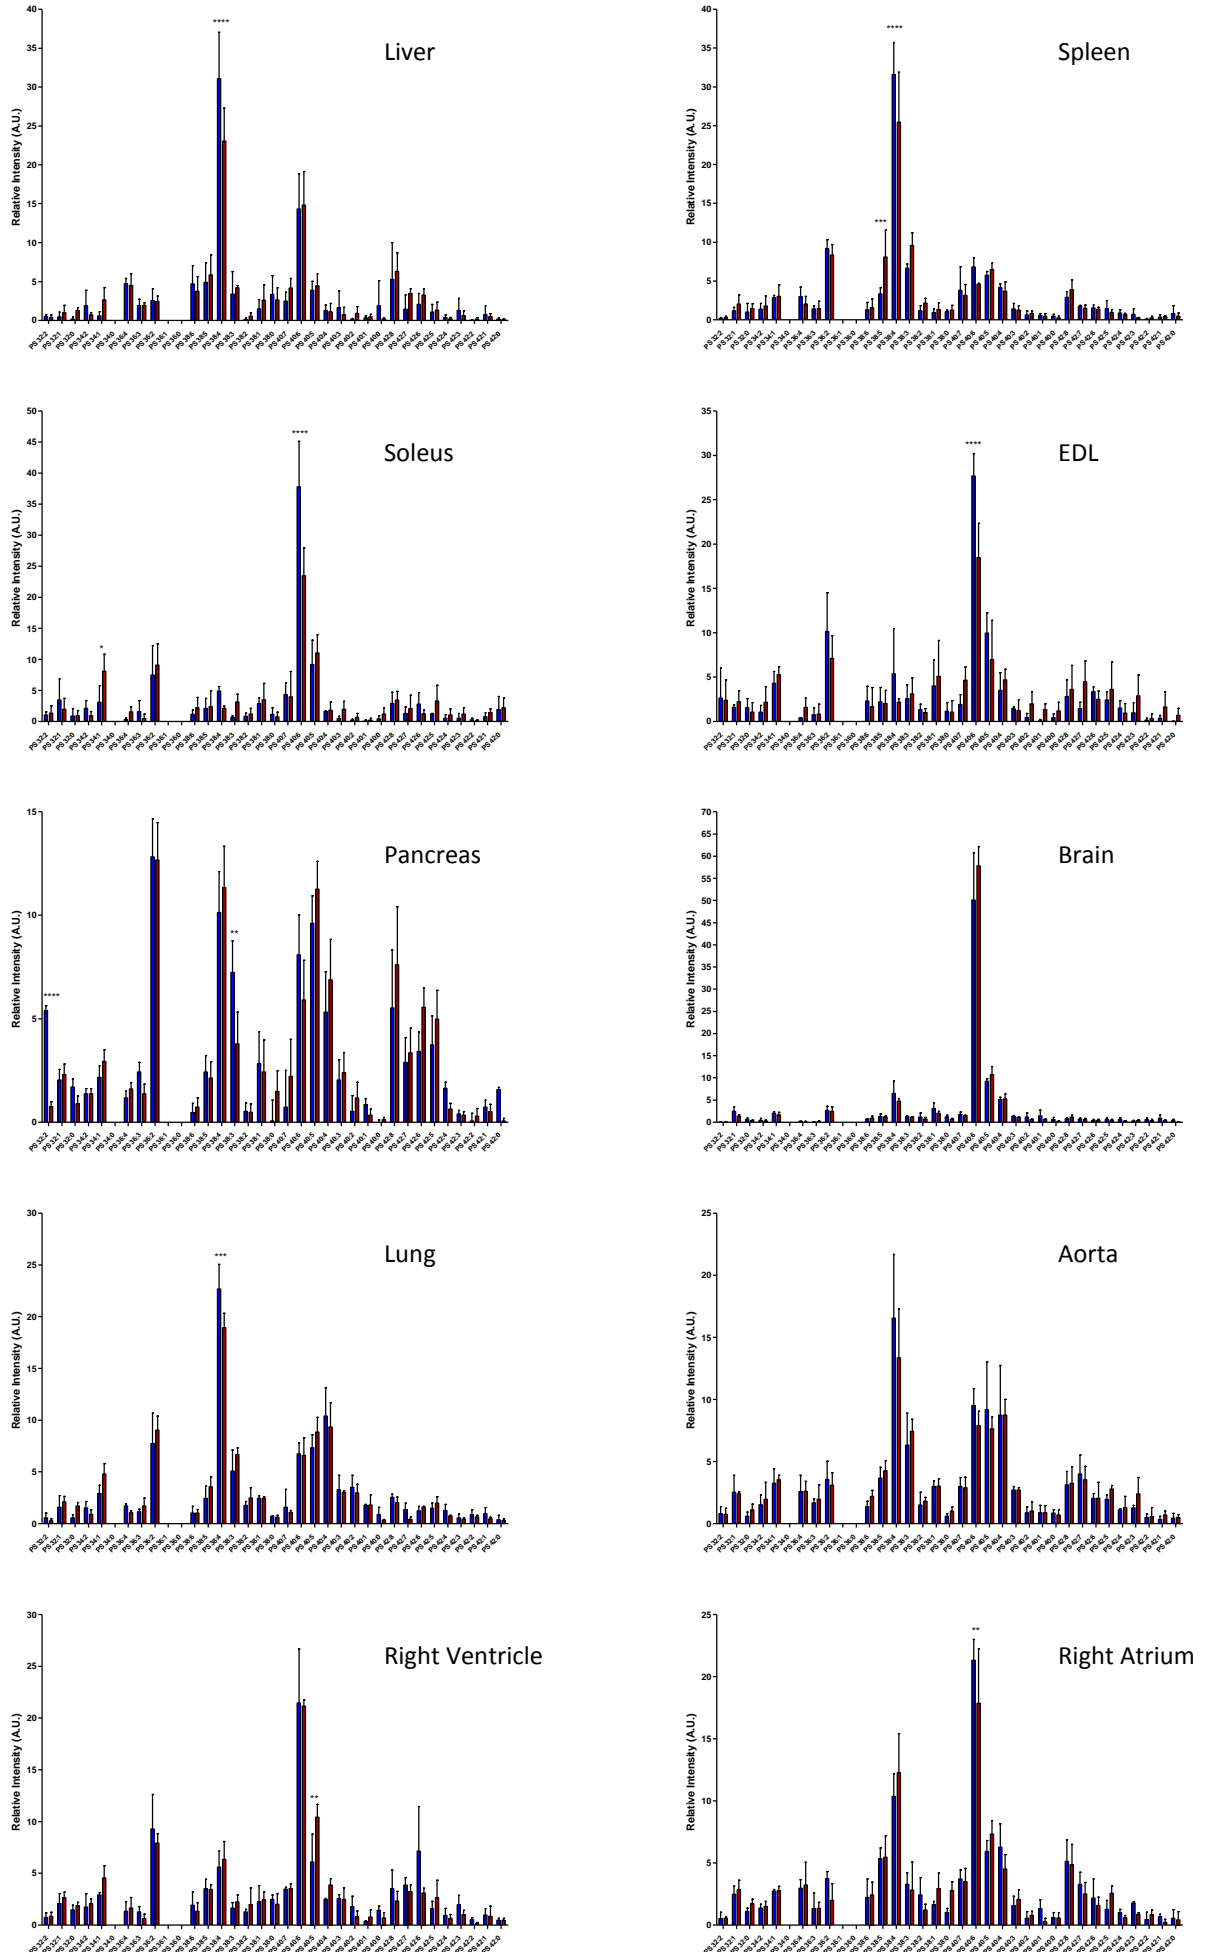

Figure S6: PS species distribution in various organs as a function of the diet.

Total lipids were extracted and phospholipid species were purified and analyzed by ESI-MS from samples corresponding to the indicated organs obtained either from rats fed with a normal (CTL) or HFHF diet (HFHF), as described in the “Materials and Methods” section. PS subspecies distribution in each case are displayed. The total carbon chain length (x) and number of carbon-carbon double bonds (y) of the main PS molecular species (x:y) are indicated. Values are means  $\pm$  S.D. of four independent determinations from four individuals from both groups in each case.

Statistical analysis was performed using two-way ANOVA, completed by Bonferroni post-tests to compare means variations between the two groups of animals for each PS subspecies.

Significant differences between CTL and HFHF are indicated (\*\*\*\*P < 0.0001, \*\*\*P < 0.001, and \*\*P < 0.01).

# Supplementary Fig. 7

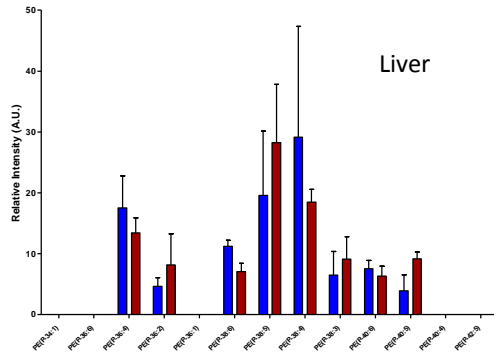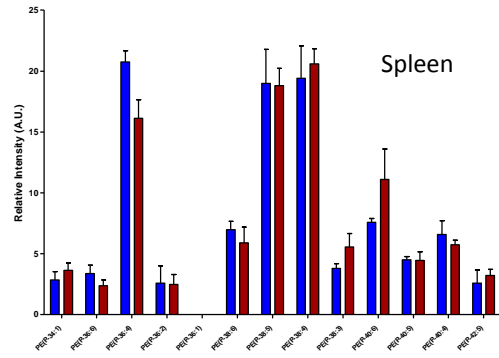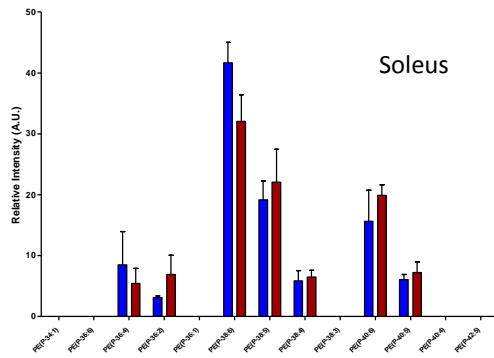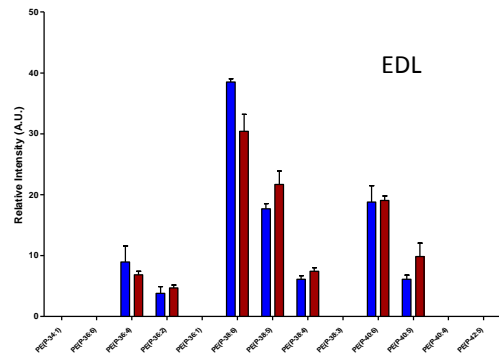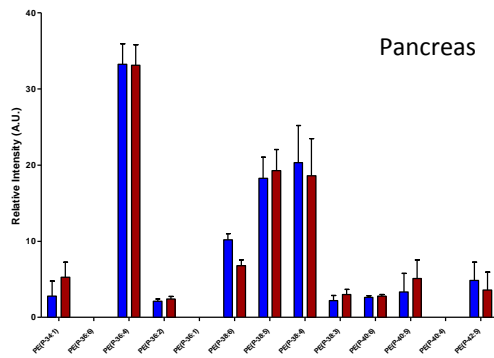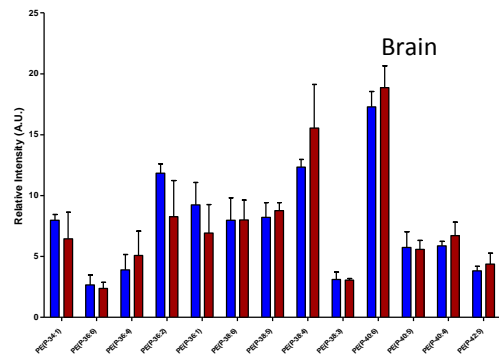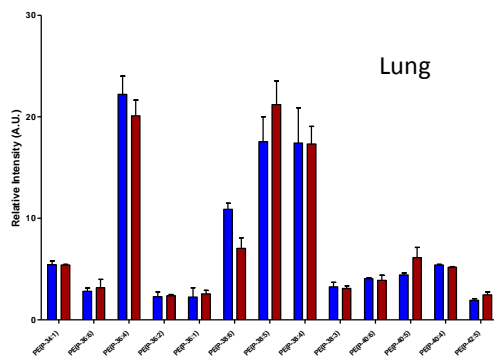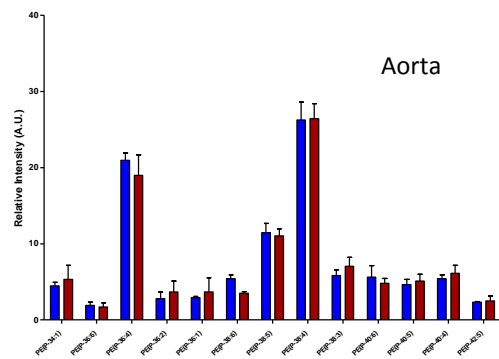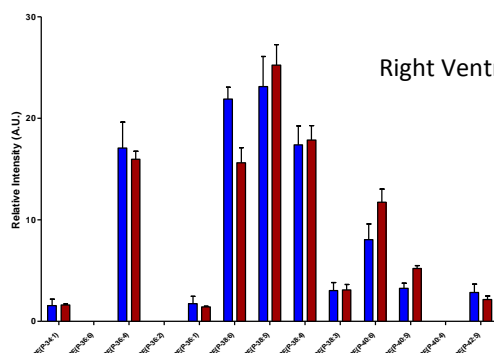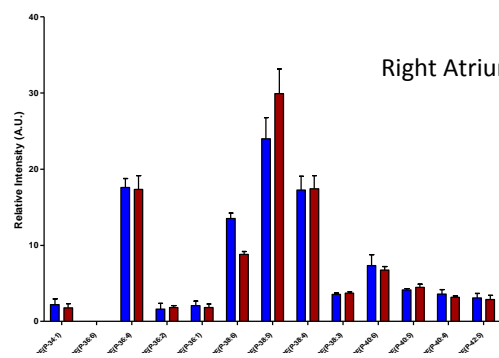

Figure S7: PE(P) species distribution in various organs as a function of the diet.

Total lipids were extracted and phospholipid species were purified and analyzed by ESI-MS from samples corresponding to the indicated organs obtained either from rats fed with a normal (CTL) or HFHF diet (HFHF), as described in the “Materials and Methods” section. PE(P) subspecies distribution in each case are displayed. The total carbon chain length (x) and number of carbon-carbon double bonds (y) of the main PS molecular species (x:y) are indicated. Values are means  $\pm$  S.D. of four independent determinations from four individuals from both groups in each case. Statistical analysis was performed using two-way ANOVA, completed by Bonferroni post-tests to compare means variations between the two groups of animals for each PE(P) subspecies. No significant differences between CTL and HFHF were observed whatever the organ considered.

## Supplementary Fig. 8

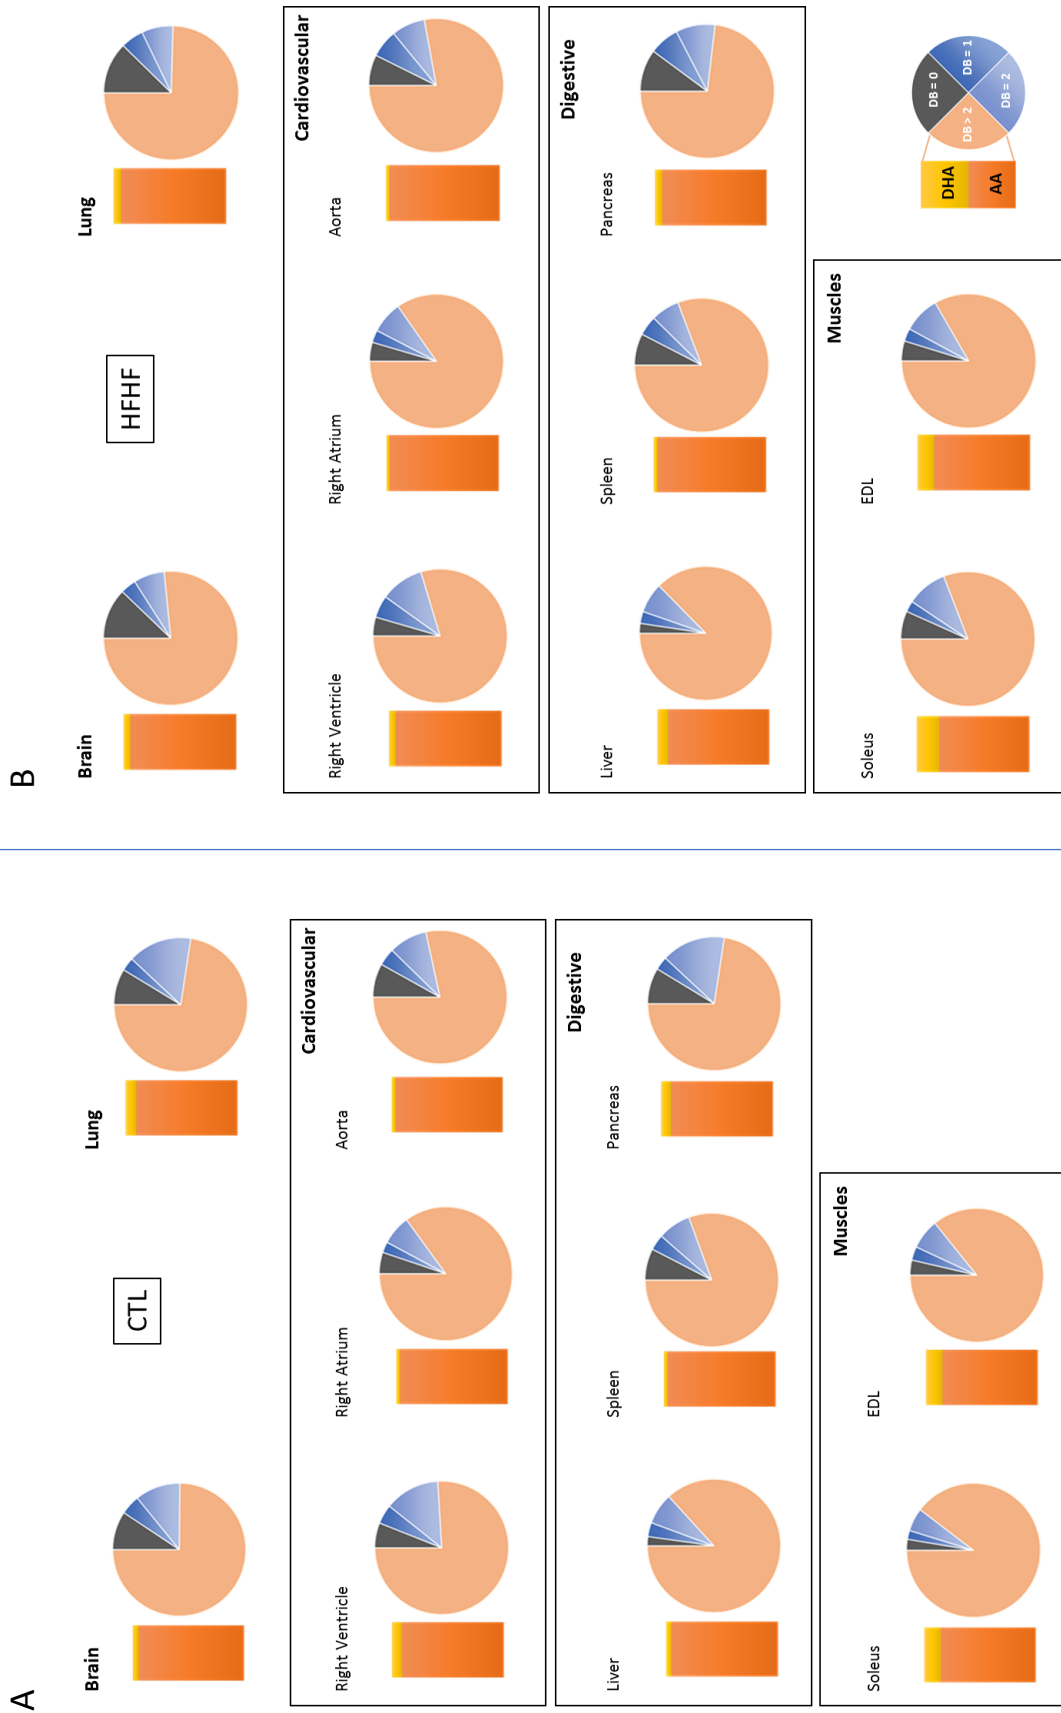

Figure S8: PI Double-Bond (DB) index and DHA to AA ratios in various organs as a function of the diet.

Total lipids were extracted and phospholipid species were purified and analyzed by ESI-MS from samples corresponding to the indicated organs obtained either from rats fed with a normal (CTL) or HFHF diet (HFHF), as described in the “Materials and Methods” section. The relative percentage of saturated (DB=0: no double bonds) versus monounsaturated (DB=1: one double bond), diunsaturated (DB=2: two double bonds) and polyunsaturated (DB > 2: > two double bonds) phosphatidylinositol (PI) species was obtained from the PI subspecies distribution displayed in Supplementary Fig. 4. The ratio of Arachidonic Acid (AA)- to Docosahexaenoic Acid (DHA)-containing PI subspecies in the various organs is also displayed.



## Supplementary Fig. 9

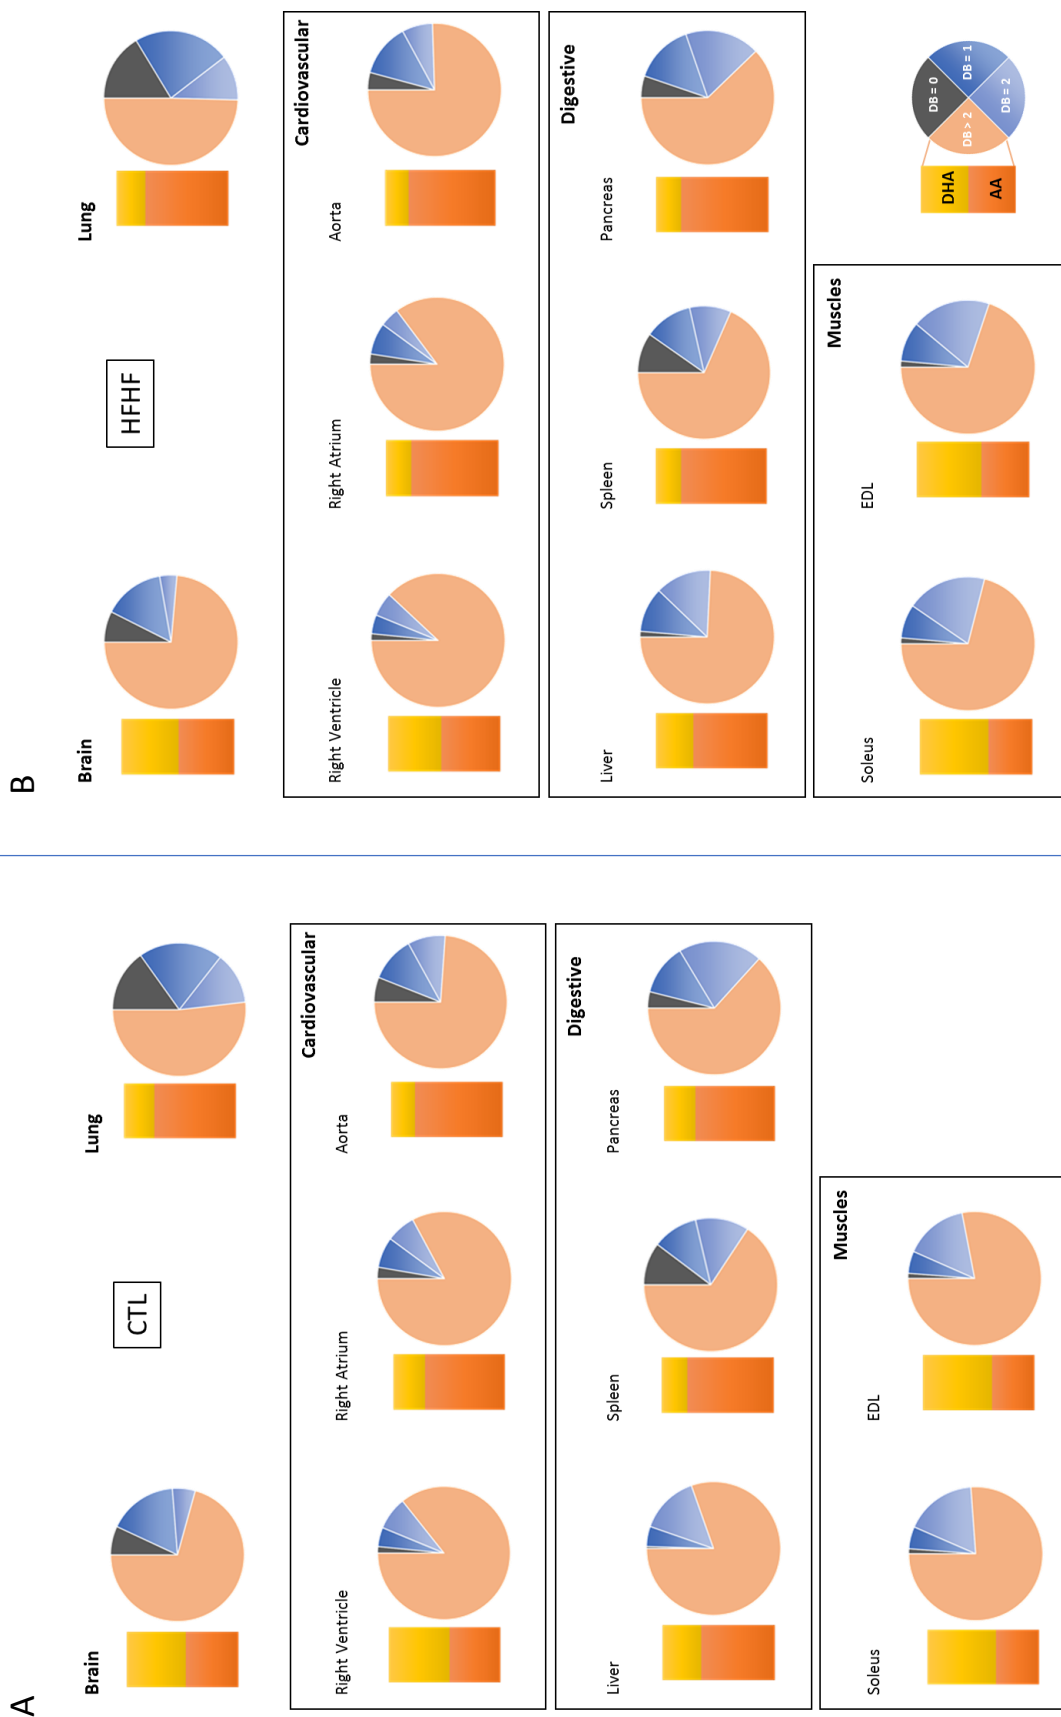

Figure S9: PE Double-Bond (DB) index and DHA to AA ratios in various organs as a function of the diet.

Total lipids were extracted and phospholipid species were purified and analyzed by ESI-MS from samples corresponding to the indicated organs obtained either from rats fed with a normal (CTL) or HFHF diet (HFHF), as described in the “Materials and Methods” section. The relative percentage of saturated (DB=0: no double bonds) versus monounsaturated (DB=1: one double bond), diunsaturated (DB=2: two double bonds) and polyunsaturated (DB > 2: > two double bonds) phosphatidylethanolamine (PE) species was obtained from the PE subspecies distribution displayed in Supplementary Fig. 5. The ratio of Arachidonic Acid (AA)- to Docosahexaenoic Acid (DHA)-containing PE subspecies in the various organs is also displayed.

### Supplementary Fig. 10

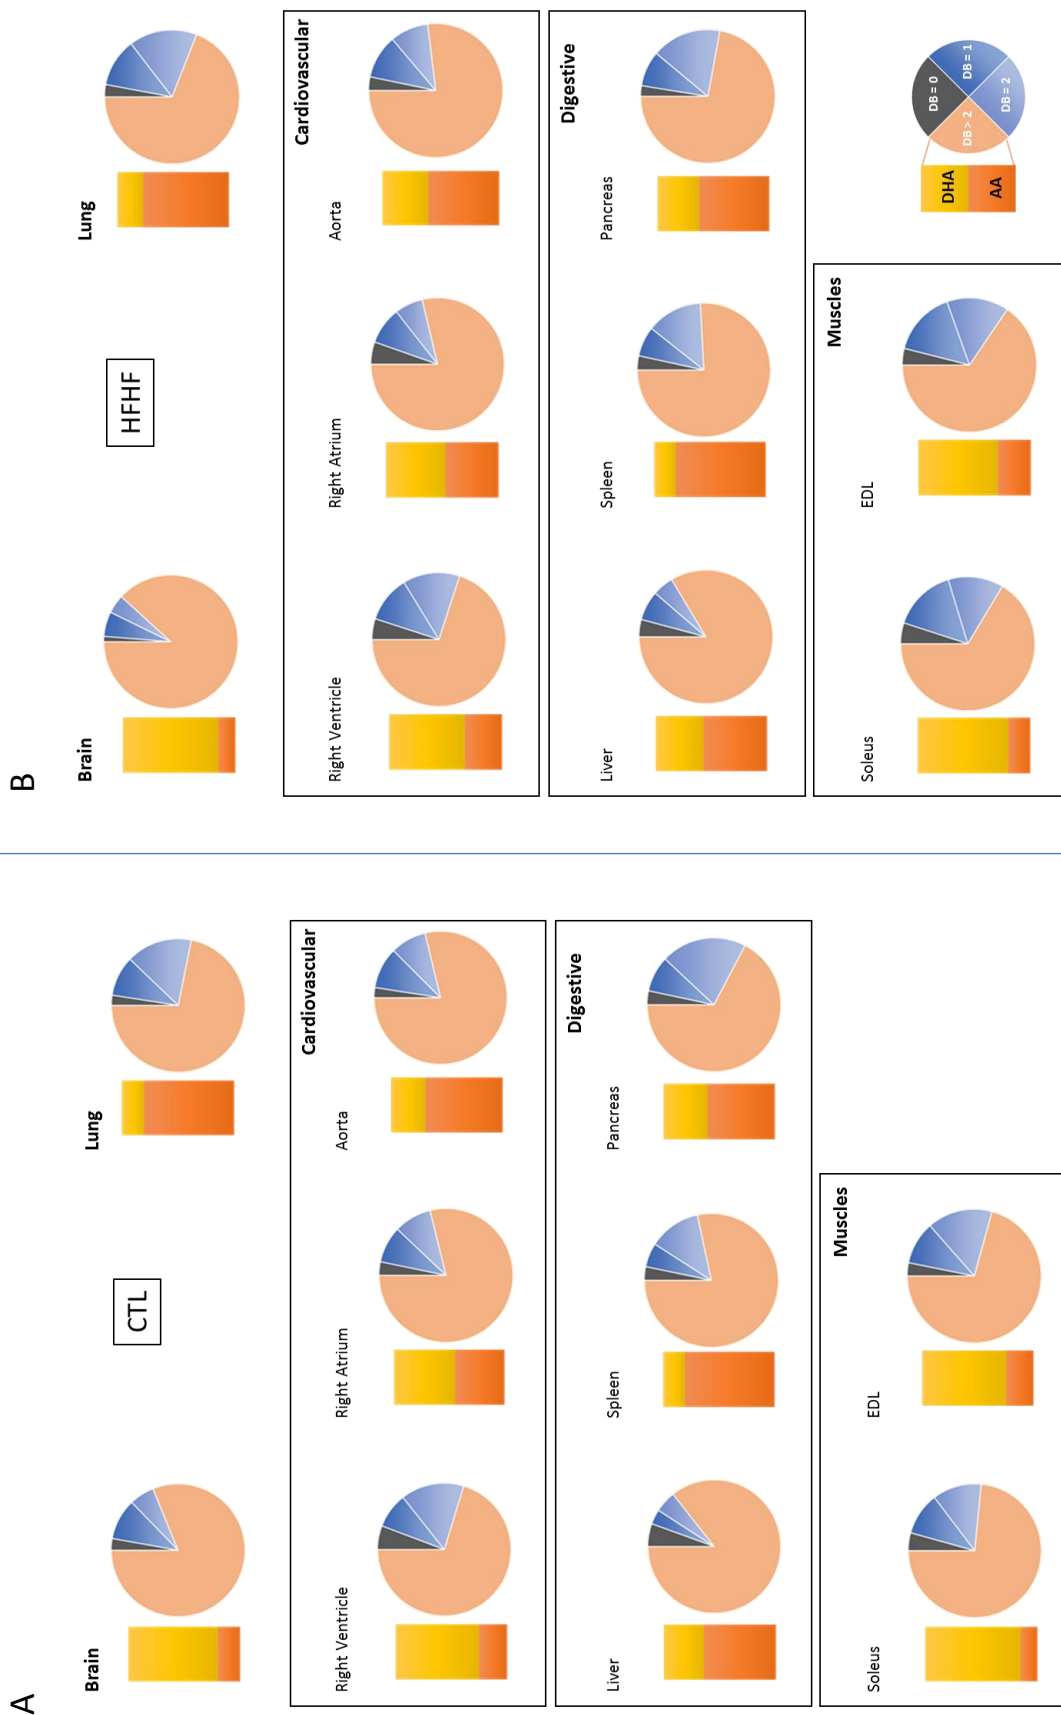

Figure S10: PS Double-Bond (DB) index and DHA to AA ratios in various organs as a function of the diet.

Total lipids were extracted and phospholipid species were purified and analyzed by ESI-MS from samples corresponding to the indicated organs obtained either from rats fed with a normal (CTL) or HFHF diet (HFHF), as described in the “Materials and Methods” section. The relative percentage of saturated (DB=0: no double bonds) versus monounsaturated (DB=1: one double bond), diunsaturated (DB=2: two double bonds) and polyunsaturated (DB > 2: > two double bonds) phosphatidylserine (PS) species was obtained from the PS subspecies distribution displayed in Supplementary Fig. 6. The ratio of Arachidonic Acid (AA)- to Docosahexaenoic Acid (DHA)-containing PS subspecies in the various organs is also displayed.

# Supplementary Fig. 11

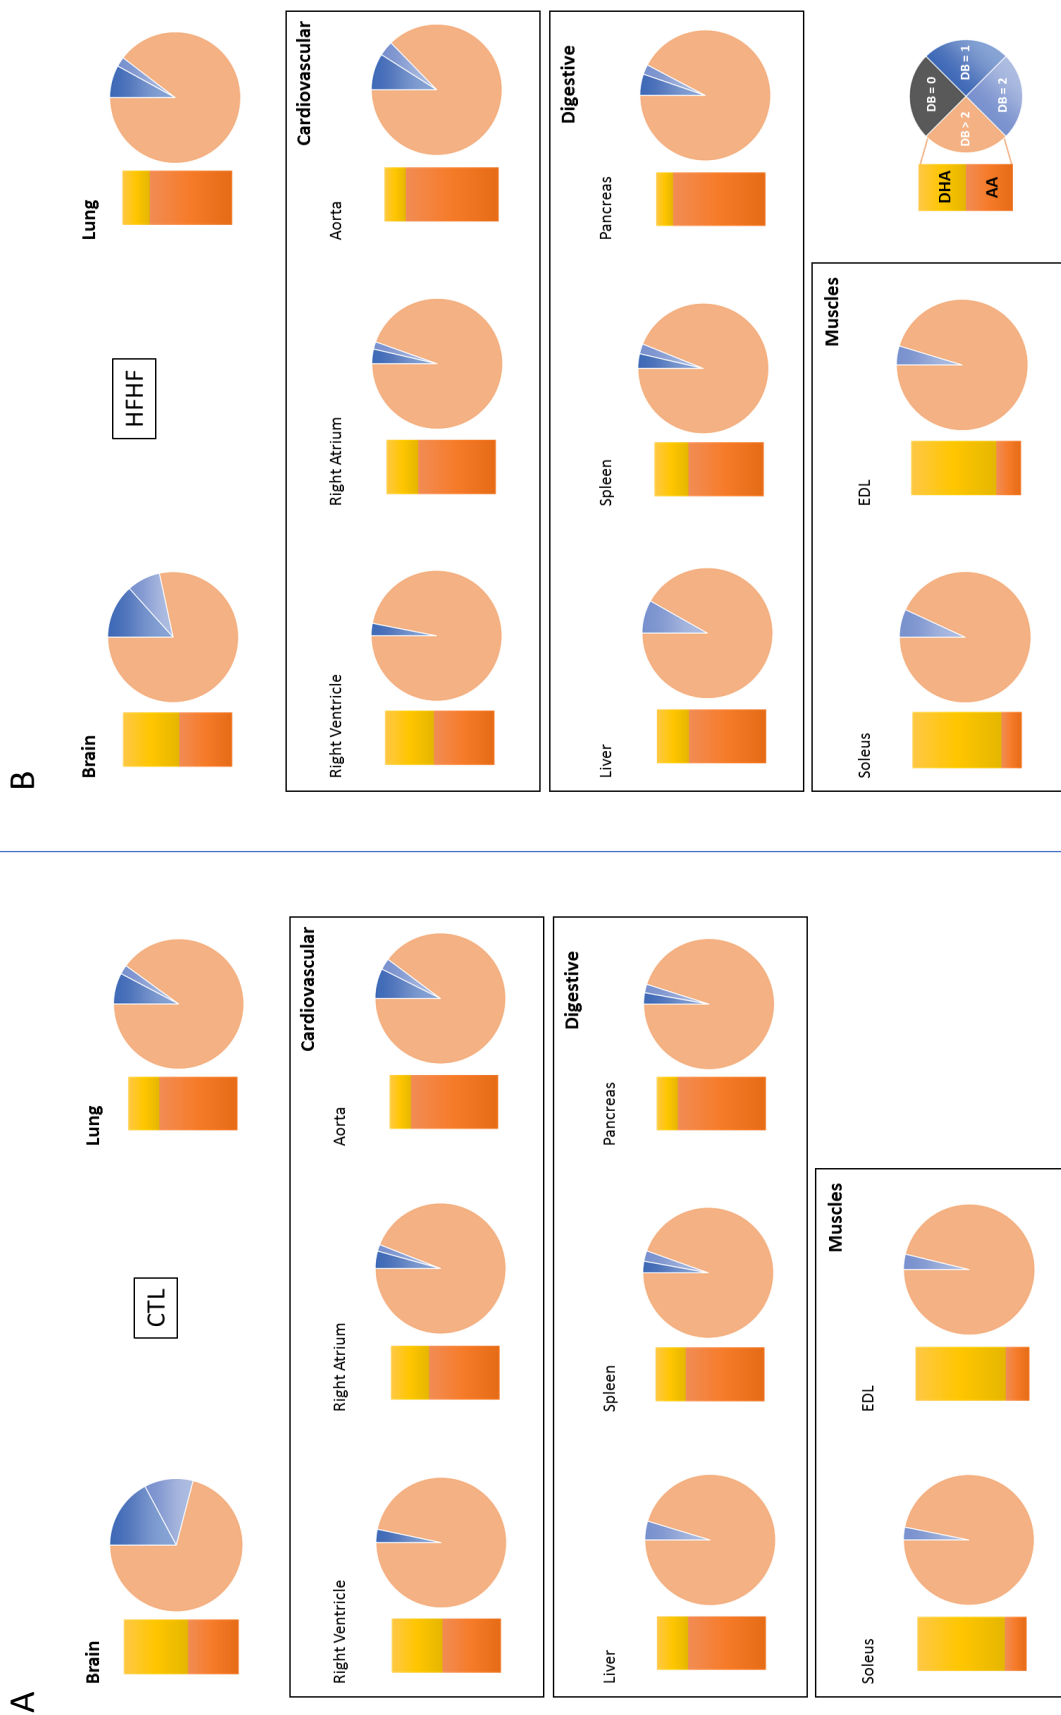

Figure S11: PE(P) Double-Bond (DB) index and DHA to AA ratios in various organs as a function of the diet.

Total lipids were extracted and phospholipid species were purified and analyzed by ESI-MS from samples corresponding to the indicated organs obtained either from rats fed with a normal (CTL) or HFHF diet (HFHF), as described in the “Materials and Methods” section. The relative percentage of saturated (DB=0: no double bonds) versus monounsaturated (DB=1: one double bond), diunsaturated (DB=2: two double bonds) and polyunsaturated (DB > 2: > two double bonds) PE(P) species was obtained from the PE(P) subspecies distribution displayed in Supplementary Fig. 7. The ratio of Arachidonic Acid (AA)- to Docosahexaenoic Acid (DHA)-containing PE(P) subspecies in the various organs is also displayed.

## Supplementary Fig. 12

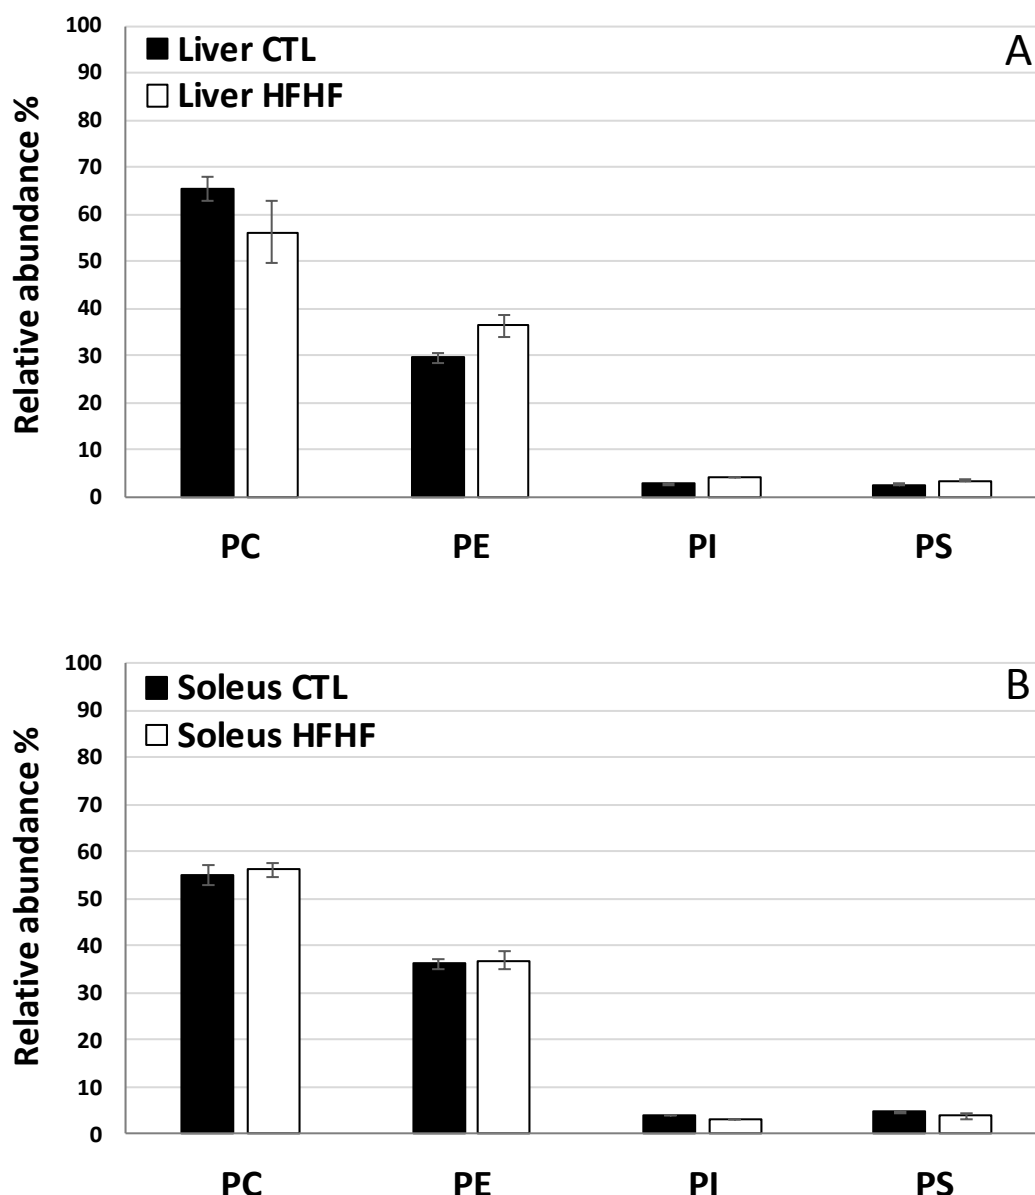

Figure S12: % contribution of the various PL classes in the liver and the muscle (soleus) under Control and HFHF diets.

Total lipids were extracted and analyzed by ESI-MS from samples corresponding to the indicated organs obtained from either rats fed with a normal (CTL) or HFHF diet (HFHF), as described in the “Materials and Methods” section. In these specific experiments, a mixture of internal standards (one internal standard per PL class) was added for MS analysis. The corresponding standards were as follows: PC (15:0/18:1), PE (15:0/18:1), PI (15:0/18:1) and PS (15:0/18:1) (Avanti Polar Lipids, Alabaster, Alabama, USA). MS experiments were performed both in positive ion mode to analyze PC, and in negative ionization to analyze PE, PI and PS. The result of a PL class is calculated as the sum of quantification result of all molecular species detected in this class. The data are displayed as the relative abundance of PC, PE, PI and PS to total PL in the liver (A) and soleus muscle (B). t-tests revealed no-significant differences in PL classes distribution associated to the diet in both organs.

## Supplementary Fig. 13

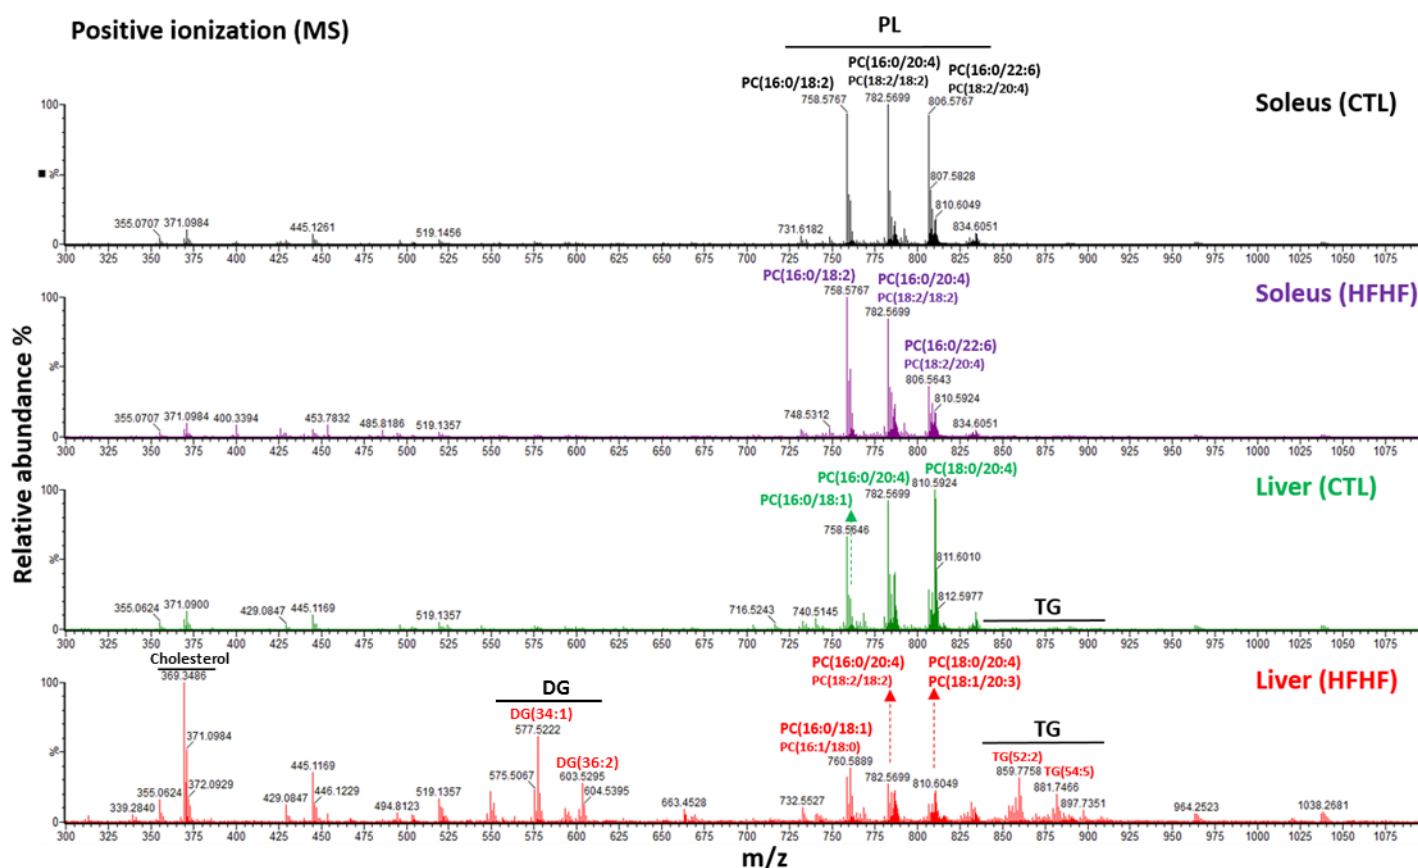

Figure S13: Representative positive ion mass spectra of non-purified lipid extracts obtained from the liver and soleus of rats fed under a Normal (CTL) or HFHF diet.

Non-purified lipid extracts were analyzed in the positive ion mode with a scan range from 300 to 1200  $m/z$  to detect Cholesterol, Diglycerides (DG), Triglycerides (TG) and PC species, as described in the “Materials and Methods” section. As shown, if the HFHF diet mainly induced variations in the relative proportions of PC species in the soleus, this diet also resulted in the deposition of neutral lipids in the liver (namely Cholesterol, and DG detected as their dehydrated forms, and TG) and the formation of new PC subspecies that were not detected in this organ under the CTL diet. The main PC subspecies identified by further fragmentation studies (MS/MS) are indicated in each case. Identified DG and TG subspecies corresponded to DG(16:0/18:1) (DG(34:1)), DG(18:1/18:1) (DG(36:2)), TG(16:0/18:1/18:1) (TG(52:2)) and TG(16:0/18:1/20:4) (TG(54:5)).



## Supplementary Fig. 14

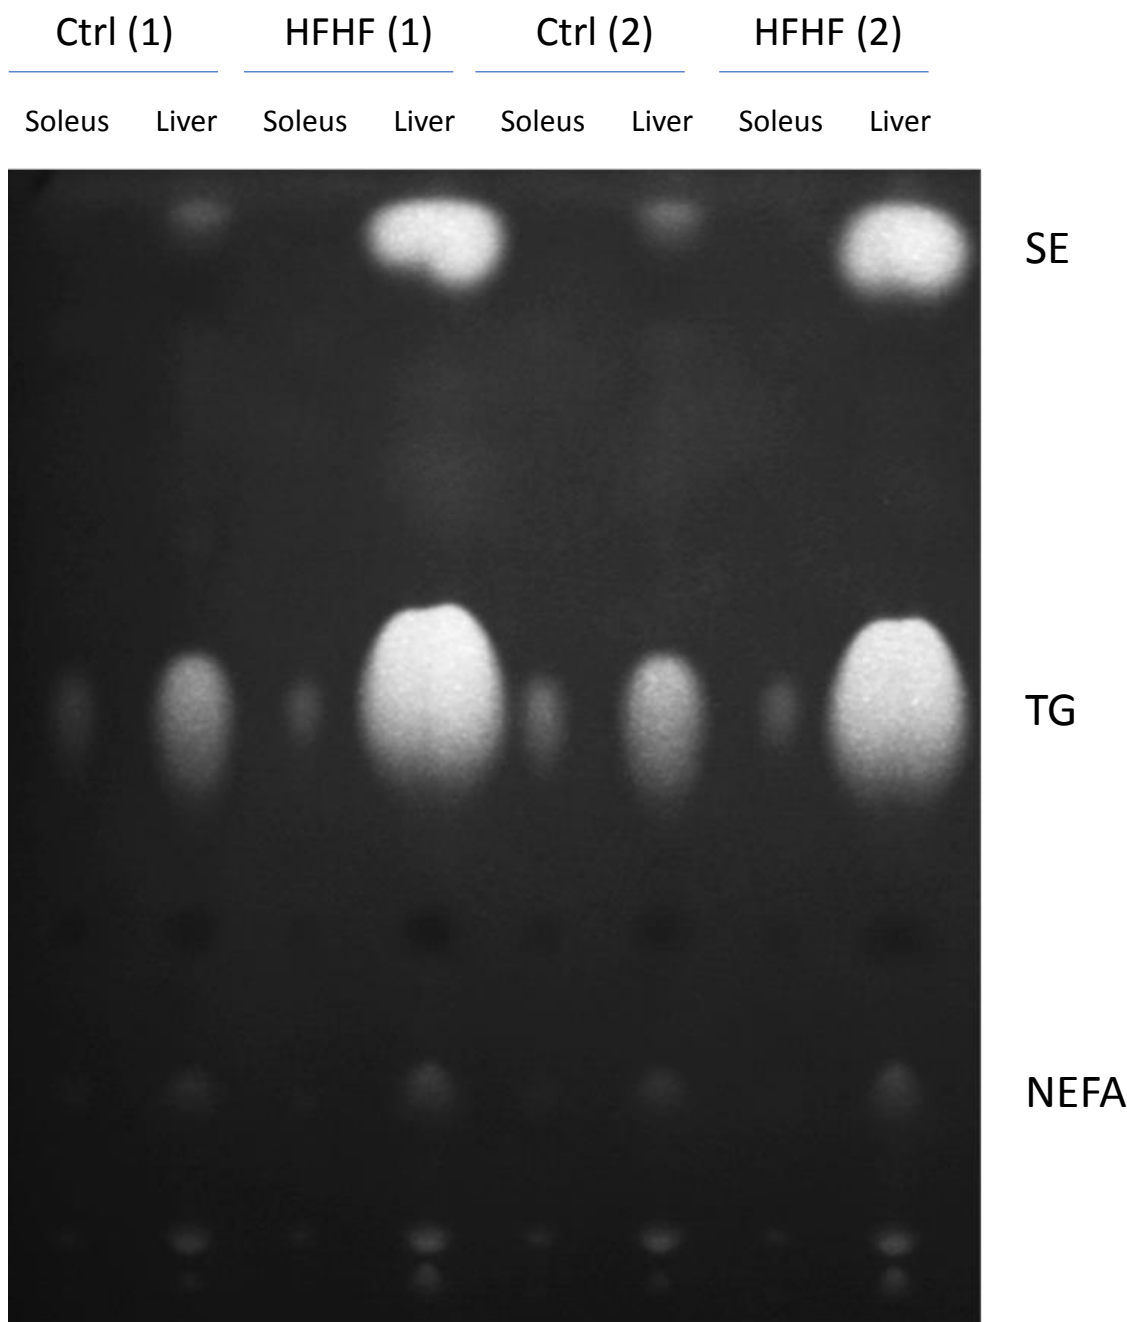

Figure S14: Neutral lipids in the liver and sole us muscle.

Total lipids were extracted from 30 mg of liver or soleus from either CTL or HFHF rats, as described under the “Materials and Methods” section. Neutral lipids were then analyzed as already described elsewhere (Ferreira et al., 2004). In brief, the final organic phase obtained after lipid extraction (Materials and Methods) was evaporated and lipids were dissolved in 100  $\mu$ l of hexane. Neutral lipids (Triglycerides (TG), Diglycerides (DG), Sterylesters (SE) and Nonesterified Fatty Acids (NEFA)) were separated by Thin Layer Chromatography in hexane/diethyl ether/acetic acid (80:20:1, by vol.) on precoated Silica gel 60 F254 plates (Merck). Lipids were visualized under UV after vaporization of a primuline solution (0.05 mg/ml in acetone/water (80:20, v/v)) and identified by using appropriate standards. Representative results obtained from two rats (1 and 2) fed either with a normal (CTL) or a HFHF diet (HFHF) are displayed.

## Supplementary Fig. 15

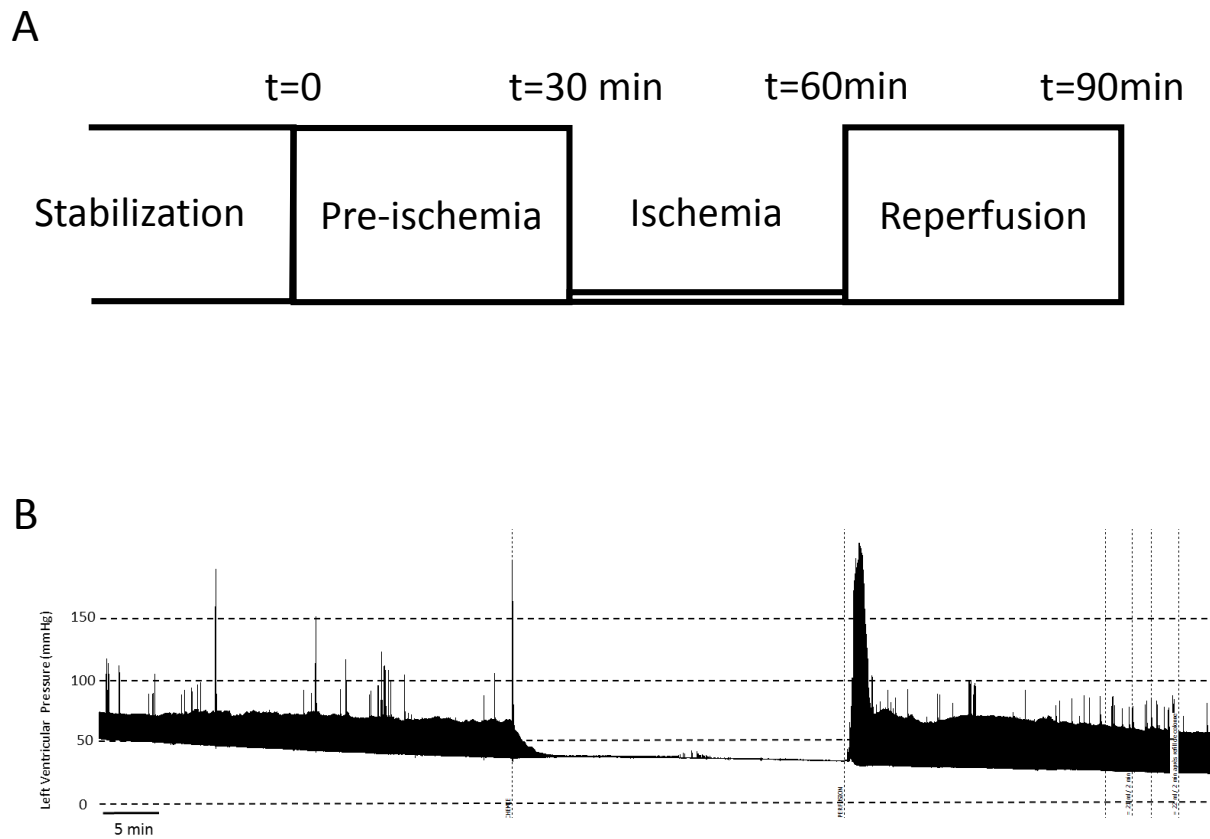

Figure S15: Langendorff protocol

A: After the hearts have been set-up according to the Langendorff method, stabilization of contractile parameters was assessed and the hearts were submitted to 3 successive experimental phases of 30 min each: stabilization, global ischemia and reperfusion. B: Typical recording of left ventricular pressure obtained during the protocol described in A.

## Supplementary Fig. 16

### ISCHEMIA

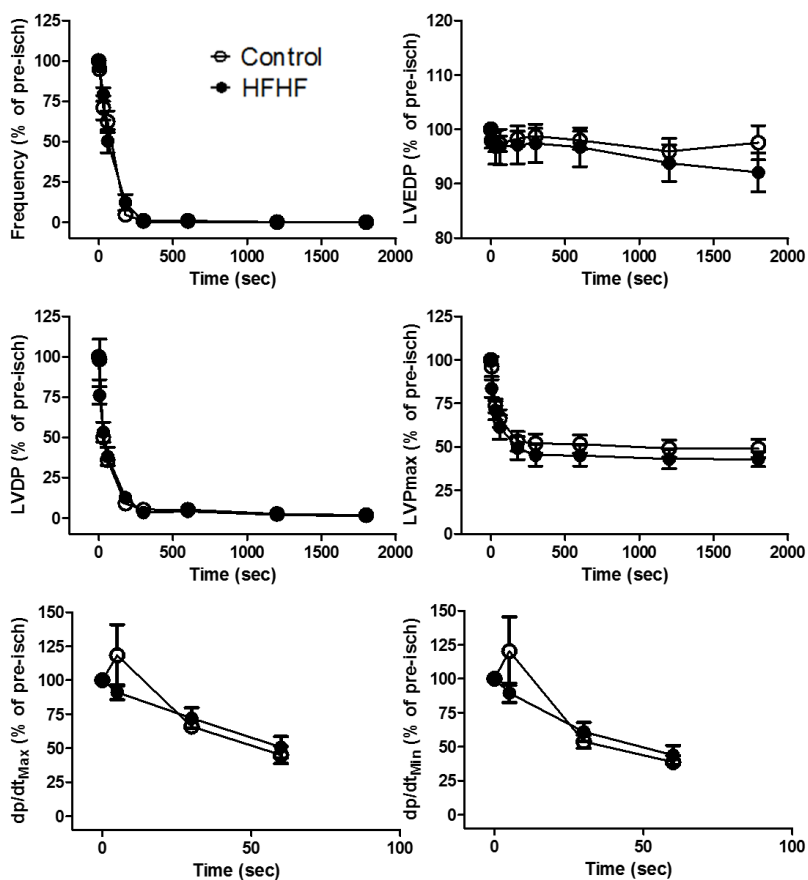

### REPERFUSION

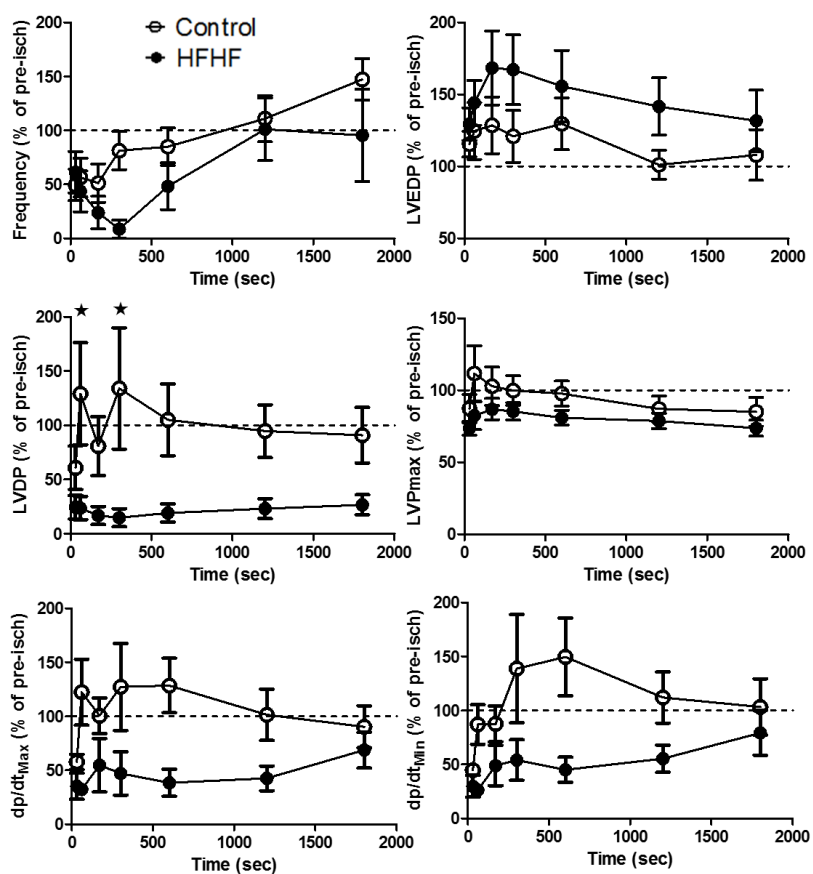

### Figure S16: Ischemia

Ischemic (upper) and reperfusion (lower) parameters were recorded in control (n=11) and HFHF (n=12) rats. Values from the two experimental groups were compared using repeated measures analysis of variance followed by Bonferroni post-hoc comparisons. A p value of less than 0.05 was considered as statistically significant.

Table S1. Percentage of the various fatty acids in the HFHF diet

The percentage of the various fatty acids in the standard (CTL; MUCEDOLA, Settimo Milanese, Italy) and “WESTERN RD” (SDS, Special Diets Services, Saint Gratien, France) are as provided by the supplier. The name, the nature (saturated or unsaturated), the total carbon chain length (x) and number of carbon-carbon double bounds (y) are indicated for each fatty acid. N. D.: Not Detectable.

|                                | Name                          | x:y  | Standard (CTL)      | Western RD          |
|--------------------------------|-------------------------------|------|---------------------|---------------------|
|                                |                               |      | % in the diet (m/m) | % in the diet (m/m) |
| <b>Saturated Fatty Acids</b>   | Lauric acid                   | 12:0 | 0.006               | 0.62                |
|                                | Myristic acid                 | 14:0 | 0.003               | 2.00                |
|                                | Palmitic acid                 | 16:0 | 0.383               | 6.07                |
|                                | Stearic acid                  | 18:0 | 0.084               | 2.66                |
| <b>Unsaturated Fatty Acids</b> | Myristoleic acid              | 14:1 | N. D.               | 0.17                |
|                                | Palmitoleic acid              | 16:1 | 0.024               | 0.38                |
|                                | Oleic Acid                    | 18:1 | 0.511               | 5.64                |
|                                | Linoleic acid ( $\omega$ -6)  | 18:2 | 1.298               | 0.83                |
|                                | Linolenic acid ( $\omega$ -3) | 18:3 | 0.247               | 0.13                |

## Supplementary Reference

Ferreira, T., Regnacq, M., Alimardani, P., Moreau-Vauzelle, C., and Berges, T. (2004). Lipid dynamics in yeast under haem-induced unsaturated fatty acid and / or sterol depletion. *Biochem J* 378, 899-908.
